# Supplementary material
Source: publisher figshare collection journal article supplement (https://acs.figshare.com/ndownloader/files/4783093)
Supplement: Supplementary file 1 [file 4783093]

## Supporting Information

### Synthesis

2-Methyl-3-hydroxypyridine, 2-chloro-3-hydroxypyridine, 2-bromo-3-hydroxypyridine, 2-chloro-3-aminopyridine and 2-bromo-3-aminopyridine were purchased from Lancaster and/or Acros Chemicals and used as such for crystallization. Compounds are named as halo derivatives of the parent hydroxy-/ amino-pyridine.

**2-Iodo-3-hydroxypyridine:** 3-Hydroxypyridine, KOH and NaI (1.0 equiv each) were dissolved in MeOH (15 mL), 4% NaOCl solution (1.0 equiv) was slowly added at 0 °C. The solution was neutralised after 2 h and the solid product was separated by filtration. <sup>1</sup>H NMR: (CDCl<sub>3</sub>, 200 MHz) δ 7.98 (d, J 5 Hz, 1H), 7.22 (d, J 8 Hz, 1H), 7.16 (dd, J 8, 5 Hz, 1H), 5.49 (s, 1H).

**3-Hydroxypyridine-*N*-oxide:** 3-Hydroxypyridine and *m*-CPBA (1.0 equiv each) were dissolved in EtOAc (10 mL) and stirred at room temperature for 2 h. The precipitated solid product was collected by filtration. The other *N*-oxides were prepared by the same procedure.

### <sup>1</sup>H-NMR:

**3-Hydroxypyridine-*N*-oxide:** (DMSO-*d*<sub>6</sub>, 200 MHz) δ 10.49 (s, 1H), 7.75 (s, 1H), 7.73 (d, J 6 Hz, 1H), 7.21 (dd, J 8, 6 Hz, 1H), 6.81 (d, J 8 Hz, 1H).

**2-Methyl-3-hydroxypyridine-*N*-oxide:** (DMSO-*d*<sub>6</sub>, 400MHz) δ 10.46 (s, 1H), 7.81 (d, J 6 Hz, 1H), 7.06 (dd, J 8, 6 Hz, 1H), 6.81 (d, J 8 Hz, 1H), 2.24 (s, 3H).

**2-Chloro-3-hydroxypyridine-*N*-oxide:** (DMSO-*d*<sub>6</sub>, 400MHz) δ 11.36 (s, 1H), 8.00 (d, J 6 Hz, 1H), 7.20 (dd, J 8, 6 Hz, 1H), 6.94 (d, J 8 Hz, 1H).

**2-Bromo-3-hydroxypyridine-*N*-oxide:** (DMSO-*d*<sub>6</sub>, 200MHz) δ 10.90 (s, 1H), 7.85 (d, J 5 Hz, 1H), 6.99 (dd, J 7, 5 Hz, 1H), 6.81 (d, J 7 Hz, 1H).

Attempted synthesis of 2-ethynyl derivatives of 3-pyridinol **1** resulted in cyclized benzofuran products (Scheme S1). For other examples of this facile reaction, see:

- (1) Chakrabarty, M.; McConville, D. B.; Saito, T.; Meng, H.; Rinaldi, P. L.; Tessier, C. A.; Youngs, W. J. *Tetrahedron Lett.* **1998**, 39, 8237.
- (2) Arcadi, A.; Cacchi, S.; Giuseppe, S. D.; Fabrizi, G.; Marinelli, F. *Org. Lett.* **2002**, 4, 2409.

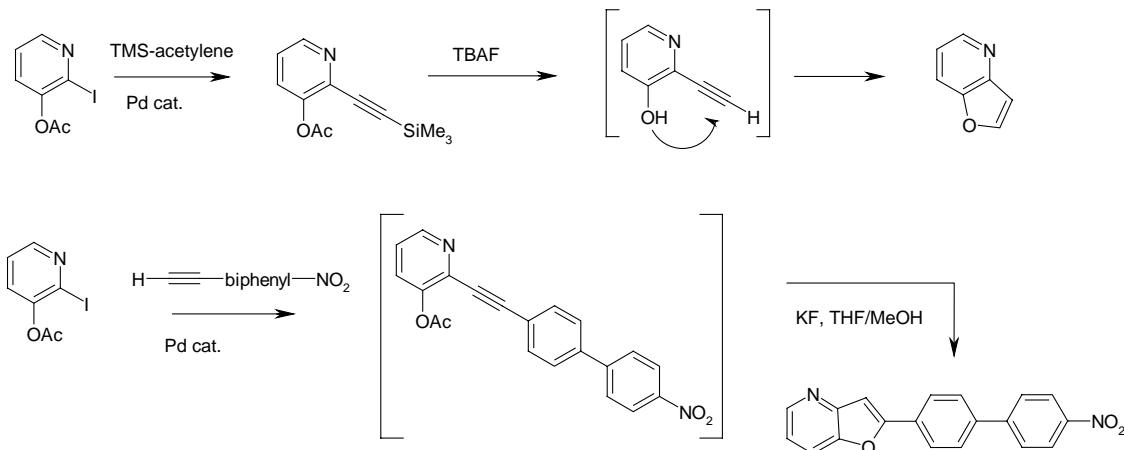

**Scheme S1** Attempted synthesis of 2-ethynyl derivatives was unsuccessful due to cyclization from proximal hydroxyl group to benzofuran ring.

### Crystallographic data

Crystal data was collected on Bruker SMART APEX CCD with Mo-K $\alpha$  radiation ( $\lambda$  = 0.71073 Å).

**2-Chloro-3-hydroxypyridine (1Cl):** C<sub>5</sub>H<sub>4</sub>ClNO,  $M_r$  = 129.54, orthorhombic, *Fdd2*,  $a$  = 23.069(4),  $b$  = 25.231(4),  $c$  = 3.8429(6) Å,  $V$  = 2236.8(6) Å<sup>3</sup>,  $Z$  = 16,  $R_1$  = 0.0295,  $wR_2$  = 0.0764,  $T$  = 298 K.

**2-Bromo-3-hydroxypyridine (1Br):** C<sub>5</sub>H<sub>4</sub>BrNO,  $M_r$  = 174.00, orthorhombic, *Pna2*<sub>1</sub>,  $a$  = 11.5563(12),  $b$  = 12.7285(13),  $c$  = 3.8875(4) Å,  $V$  = 571.83(10) Å<sup>3</sup>,  $Z$  = 4,  $R_1$  = 0.0198,  $wR_2$  = 0.0507,  $T$  = 100 K.

**2-Iodo-3-hydroxypyridine (1I):** C<sub>5</sub>H<sub>4</sub>INO,  $M_r$  = 220.99, orthorhombic, *Pna2*<sub>1</sub>,  $a$  = 11.5329(11),  $b$  = 12.8331(12),  $c$  = 4.2475(4) Å,  $V$  = 628.64(10) Å<sup>3</sup>,  $Z$  = 4,  $R_1$  = 0.0172,  $wR_2$  = 0.0457,  $T$  = 100 K.

**2-Methyl-3-hydroxypyridine (1Me):** C<sub>6</sub>H<sub>7</sub>NO,  $M_r$  = 109.13, monoclinic, *C2/c*,  $a$  = 11.053(2),  $b$  = 9.6151(19),  $c$  = 11.316(2) Å,  $\beta$  = 100.64(3)°,  $V$  = 1181.9(4) Å<sup>3</sup>,  $Z$  = 8,  $R_1$  = 0.1495,  $wR_2$  = 0.3050,  $T$  = 100K.

**2-Chloro-3-hydroxypyridine-*N*-oxide (2Cl):** C<sub>5</sub>H<sub>4</sub>ClNO<sub>2</sub>,  $M_r$  = 145.54, orthorhombic, *Pna2*<sub>1</sub>,  $a$  = 11.2712(14),  $b$  = 12.7754(16),  $c$  = 3.7794(5) Å,  $V$  = 544.21(12) Å<sup>3</sup>,  $Z$  = 4,  $R_1$  = 0.0266,  $wR_2$  = 0.0617,  $T$  = 100K.

**2-Bromo-3-hydroxypyridine-*N*-oxide (2Br):** C<sub>5</sub>H<sub>4</sub>BrNO<sub>2</sub>,  $M_r$  = 190.00, orthorhombic, *P2*<sub>1</sub>*2*<sub>1</sub>*2*<sub>1</sub>,  $a$  = 3.8571(5),  $b$  = 12.3235(15),  $c$  = 12.5884(15) Å,  $V$  = 598.36(13) Å<sup>3</sup>,  $Z$  = 4,  $R_1$  = 0.0252,  $wR_2$  = 0.0589,  $T$  = 298 K.

**2-Methyl-3-hydroxypyridine-*N*-oxide (2Me):** C<sub>6</sub>H<sub>7</sub>NO<sub>2</sub>, *Mr* = 125.13, monoclinic, *P*2<sub>1</sub>/*c*, *a* = 4.6258(9), *b* = 10.3353(19), *c* = 12.677(2) Å, β = 99.270(3)°, *V* = 598.18(19) Å<sup>3</sup>, *Z* = 4, *R*1 = 0.0487, *wR*2 = 0.1346, *T* = 298 K.

**3-Hydroxypyridine-*N*-oxide (2H):** C<sub>5</sub>H<sub>5</sub>NO<sub>2</sub>, *Mr* = 111.10, triclinic, *P*-1, *a* = 6.3536(8), *b* = 6.5014(8), *c* = 6.9499(8) Å, α = 113.794(2), β = 99.650(2), γ = 106.930(2)°, *V* = 237.59(5) Å<sup>3</sup>, *Z* = 2, *R*1 = 0.0398, *wR*2 = 0.1055, *T* = 298 K. C2 is disordered over two positions (C2A, C2B) with 0.5 occupancy. Similarly N1 and OH hydrogen are disordered over two positions (N1A, N1B and H1, H2) with 0.5 occupancy.

**2-Chloro-3-aminopyridine (3Cl):** C<sub>5</sub>H<sub>5</sub>ClN<sub>2</sub>, *Mr* = 128.56, monoclinic, *P*2<sub>1</sub>/*n*, *a* = 6.446(5), *b* = 8.022(6), *c* = 11.991(8) Å, β = 104.510(11)°, *V* = 600.3(7) Å<sup>3</sup>, *Z* = 4, *R*1 = 0.0429, *wR*2 = 0.1222, *T* = 298 K.

**2-Bromo-3-aminopyridine (3Br):** C<sub>5</sub>H<sub>5</sub>BrN<sub>2</sub>, *Mr* = 173.02, monoclinic, *P*2<sub>1</sub>, *a* = 7.9689(5), *b* = 13.1908(8), *c* = 11.6096(7) Å, β = 104.6860(10)°, *V* = 1180.49(13) Å<sup>3</sup>, *Z* = 8, *R*1 = 0.0243, *wR*2 = 0.0588, *T* = 100 K.

Intensities were corrected for absorption effects using the multi-scan technique SADABS. All non-hydrogen atoms were refined anisotropically. H atoms connected to C were generated by riding model and H atoms connected to oxygen were located in difference electron density maps. Structure solution and refinement were carried out with Bruker SHELXTL.

**Table S1** Inter-halogen interaction geometry in crystal structures **1-3**.

| Compound                                                                            | Space group                                          | X...X (Å)      | C-X...X-C (°)                    | Geometry <sup>a</sup>     |
|-------------------------------------------------------------------------------------|------------------------------------------------------|----------------|----------------------------------|---------------------------|
| 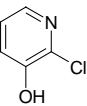 | <i>Fdd2</i>                                          | 3.350          | 158.94, 158.94                   | V-shape                   |
|  | <i>Pna2</i> <sub>1</sub>                             | 3.637          | 170.20, 121.25                   | L-shape                   |
|  | <i>Pna2</i> <sub>1</sub>                             | 3.738          | 174.45, 114.52                   | L-shape                   |
|  | <i>Pna2</i> <sub>1</sub>                             | 3.510          | 132.96, 101.41                   | Borderline L/V            |
|  | <i>P2</i> <sub>1</sub> 2 <sub>1</sub> 2 <sub>1</sub> | 3.931          | 171.52, 126.06                   | L-shape                   |
|  | <i>P2</i> <sub>1</sub>                               | 3.636<br>3.634 | 177.76, 102.57<br>148.15, 102.48 | L-shape<br>Borderline L/V |

<sup>a</sup> See Scheme 1a for classification.

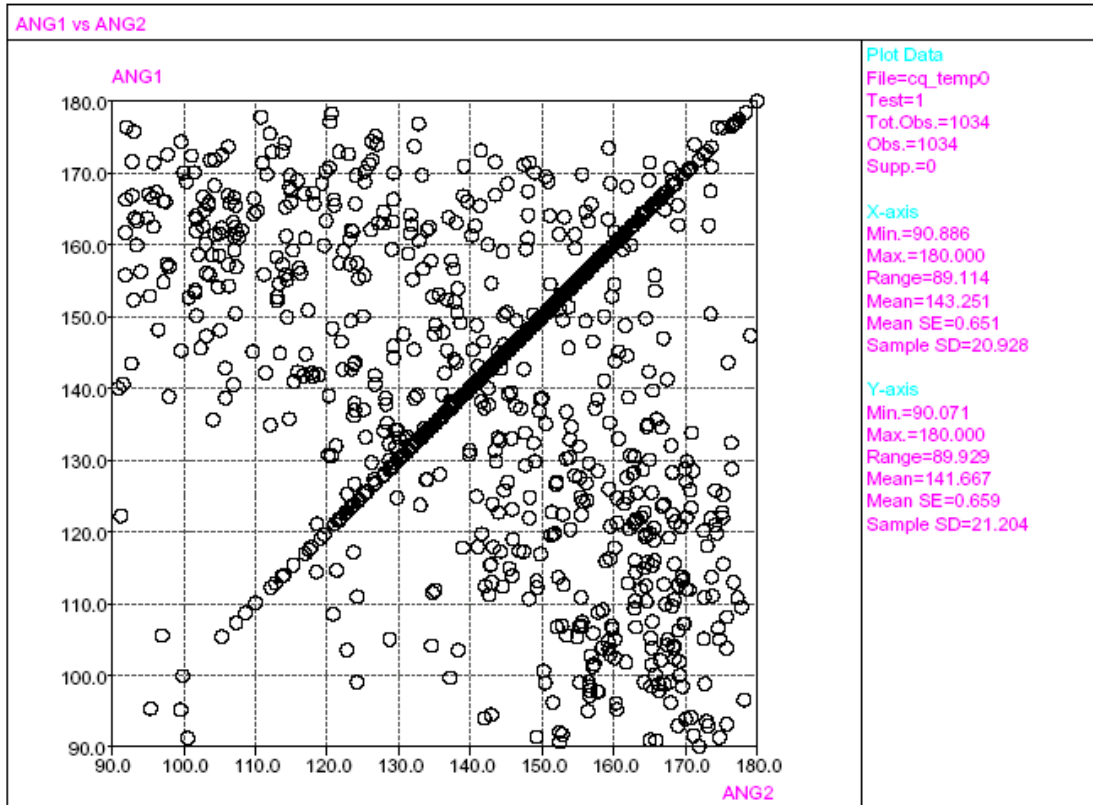

(a)

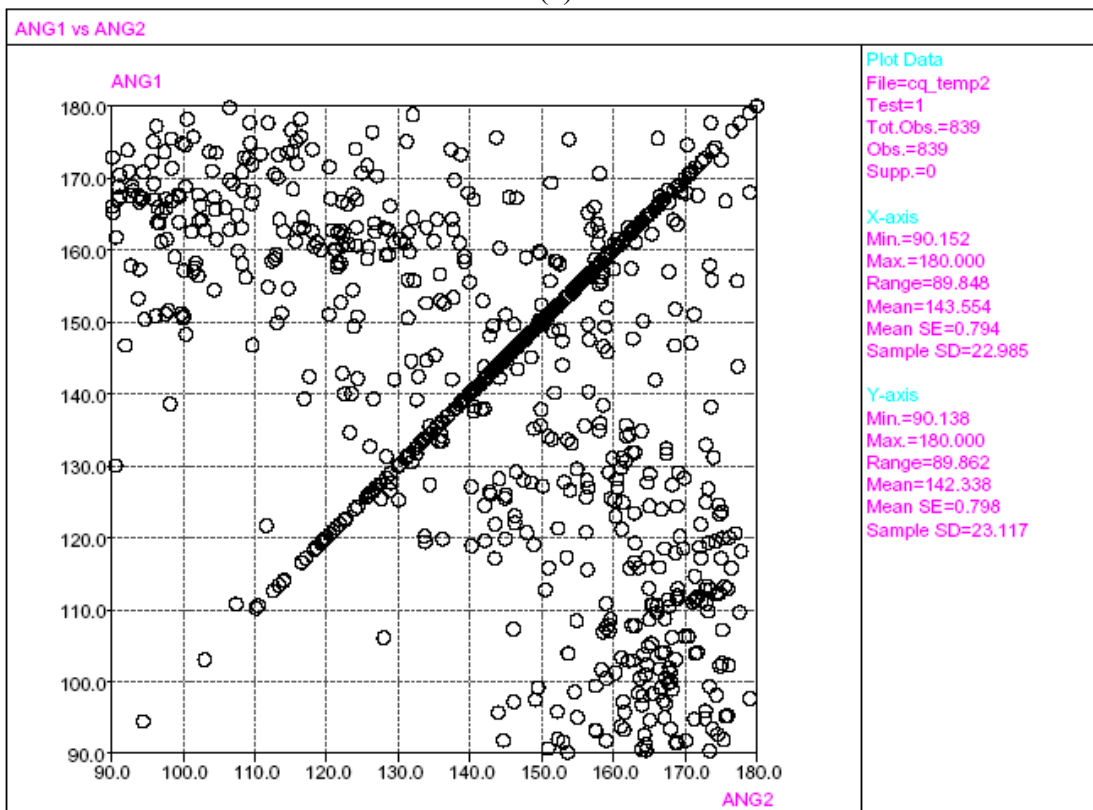

(b)

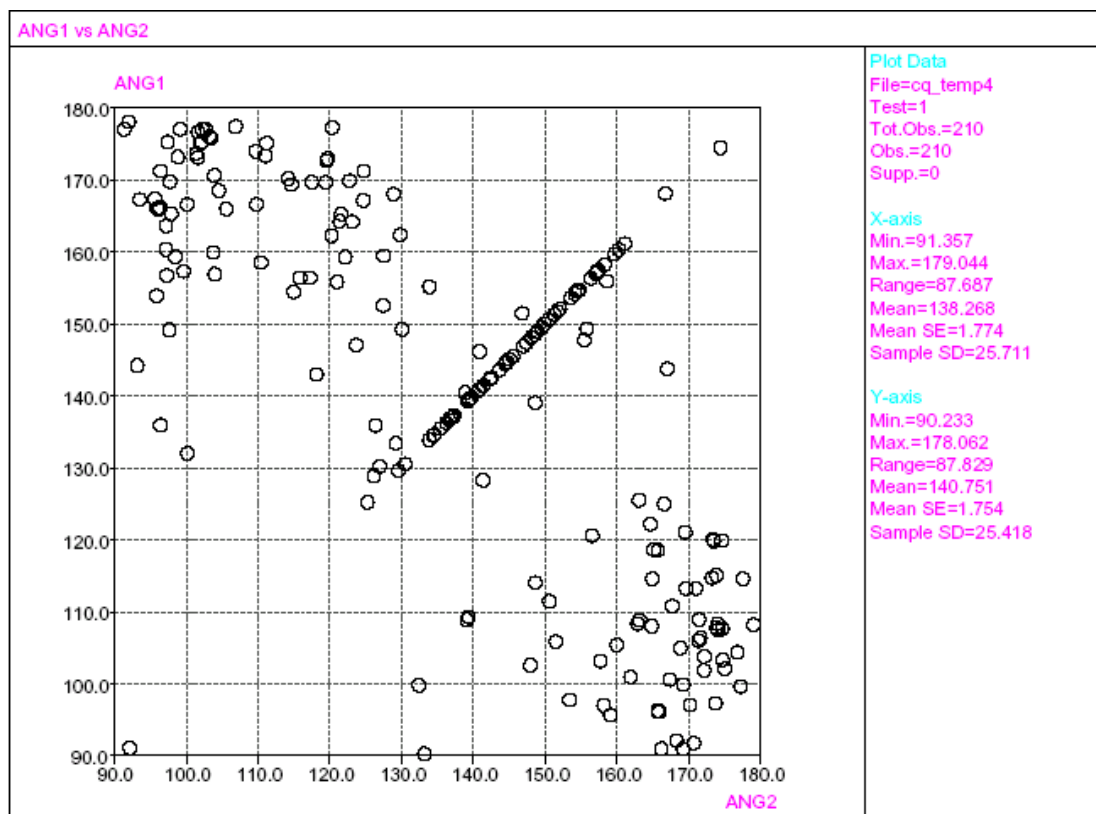

(c)

**Figure S1** Geometrical parameters of halogen...halogen interactions (C–X...X–C fragment) in accurate (3D coordinates determined, no disorder, no ions, no errors, no powder structures, not polymeric) organic crystal structures extracted from the Cambridge Structural Database (ConQuest 1.8, November 2005 update, Vista plot): (a) Cl...Cl, 3.0–3.5 Å,  $R \leq 0.05$ ; (b) Br...Br, 3.0–3.7 Å,  $R \leq 0.10$ ; (c) I...I, 3.0–4.0 Å,  $R \leq 0.10$ . Note that the proportion of L-shaped contacts ( $\theta_1 = 150\text{--}180^\circ$ ,  $\theta_2 = 90\text{--}130^\circ$ ) is larger for the more polarizable Br, I halogens compared to greater number of  $\theta_1 = \theta_2$  contacts for the electrostatic Cl atoms. See Scheme 1a for inter-halogen geometry types.

For CSD data analysis, see:

- (3) Allen, F. H. *Acta. Crystallogr., Sect. B* **2002**, 58, 380.

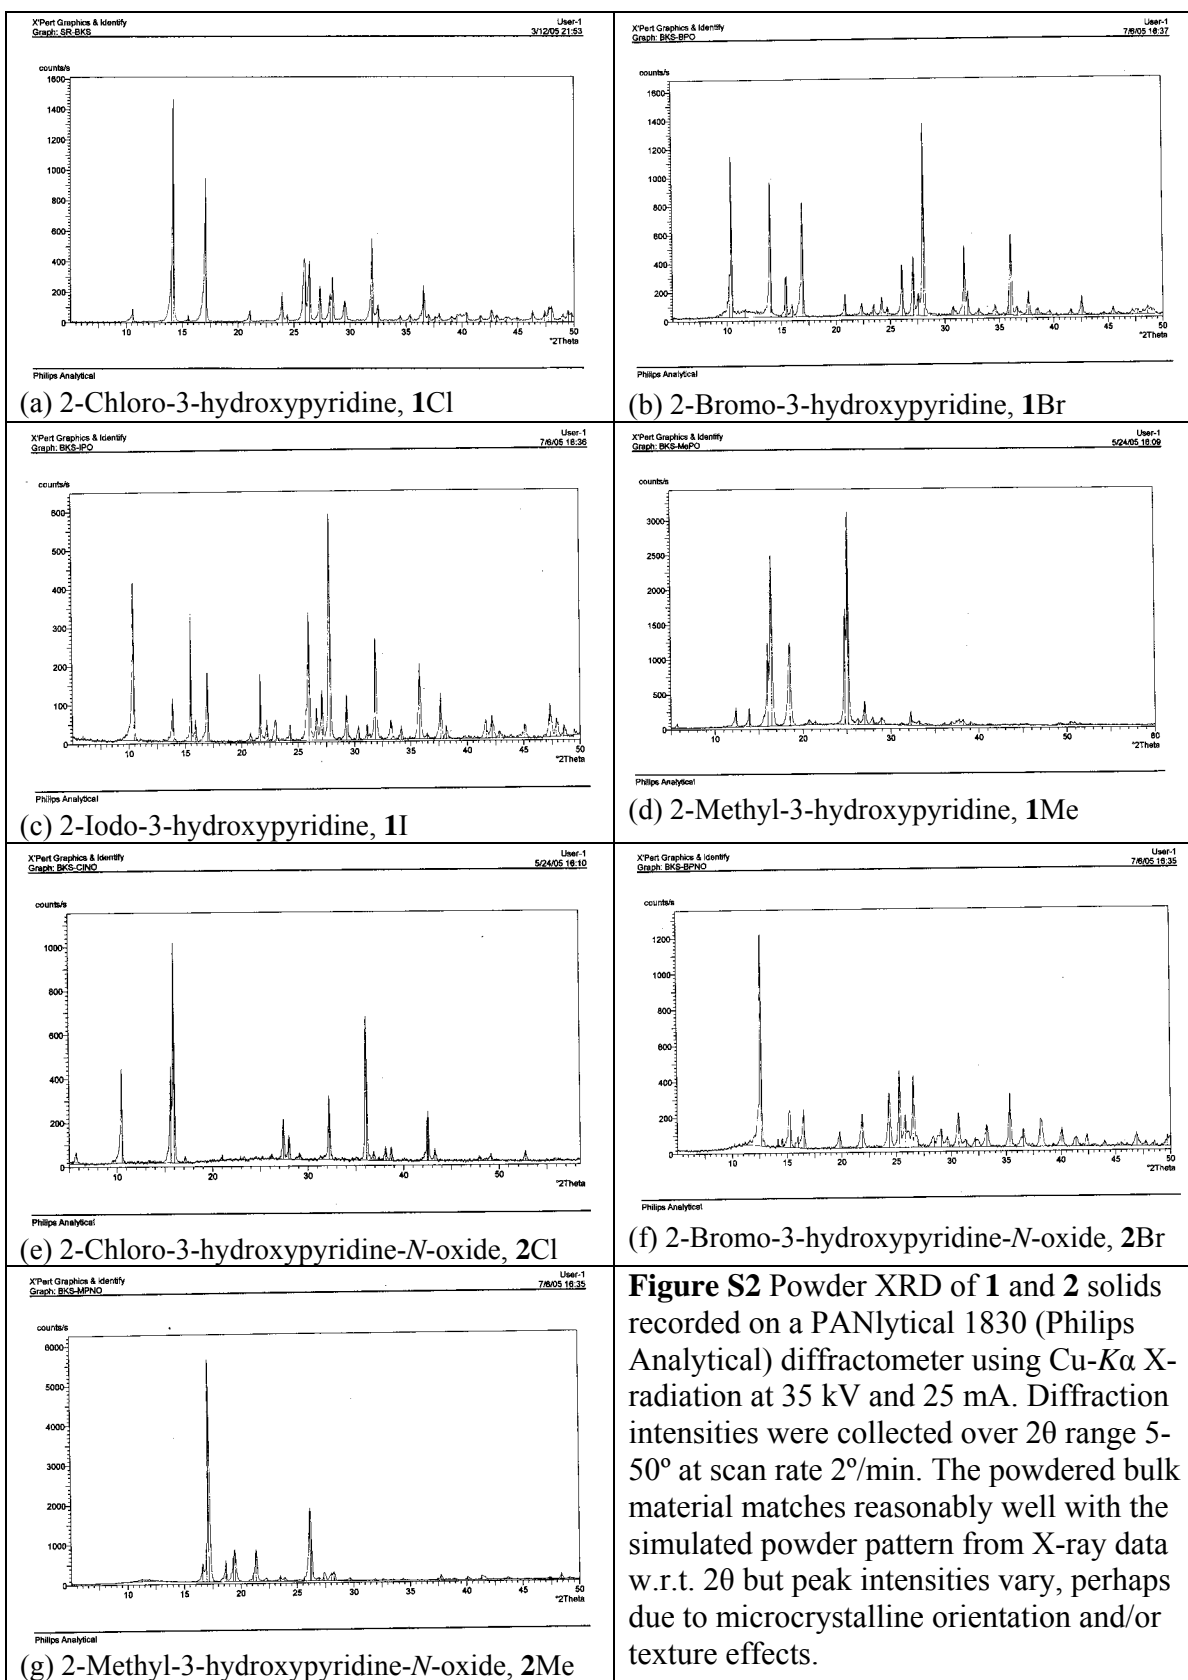

**Figure S2** Powder XRD of **1** and **2** solids recorded on a PANalytical 1830 (Philips Analytical) diffractometer using Cu- $K\alpha$  X-radiation at 35 kV and 25 mA. Diffraction intensities were collected over  $2\theta$  range 5-50° at scan rate 2°/min. The powdered bulk material matches reasonably well with the simulated powder pattern from X-ray data w.r.t.  $2\theta$  but peak intensities vary, perhaps due to microcrystalline orientation and/or texture effects.
